# Supplementary material
Source: publisher site journal article supplement (https://www.dovepress.com/article/290396)
Supplement: Supplementary file 1 [file get_supplementary_file.php]

**Appendix 1**

Project Title: [Can three-dimensional heads-up display improve ergonomics, surgical performance and ophthalmology training compared to conventional microscopy?](https://docs.google.com/forms/d/e/1FAIpQLScJBSCwdE4TFJpwuAstRc3N-_PhsiKA8hZ-WD-FNU_MRq94aw/viewform?vc=0&c=0&w=1&usp=mail_form_link)

**Consent**

**do you agree to participate in this study?**

- Yes
- No

**Demographic Data**

**Sex**

- Female
- Male

**Age** (DOB):

Nationality:

**Weight : ____**

**Height: _____**

**Experience**

**What is your Sub-specialty?**

- Retina
- Cornea
- Glaucoma
- Pediatric ophthalmology
- Comprehensive ophthalmology

**How long have you practiced ophthalmology (years) (after medical school)?**

- 1-5
- 6-10
- 11-15
- 16-20
- 20+

**How many cases did you perform using 3D heads-up display?**

- None
- less than 10
- 10-50
- 51-100
- more than 100

**Activity level**

**Hours of exercise per week**

- None
- 1-3
- 4-6
- 7-9
- 10+

**Type of Exercise: choose all that apply**

- Jogging
- Walking
- Weightlifting
- Swimming
- cycling
- Pilates, aerobics or steps
- Yoga

**Workload**

**On the average, How Many hours per week do you perform surgeries?**

- less than 3 hours
- 3-6
- 7-10
- 11-14
- 15+

**Musculoskeletal discomfort level**

**Have you experienced musculoskeletal pain in the past 5 years?**

- Yes
- No

**where is the pain mostly localized? choose all that applies**

- Neck
- lower back
- shoulders
- wrist
- hands
- I don’t have pain

**What is the intensity of pain (0= indicates no pain – 10= indicates severe pain)?**

0 1 2 3 4 5 6 7 8 9 10

**Does this pain affect your daily life activities?**

- Yes
- No

**Does this pain increase while using 3D heads-up display?**

- Yes
- No
- Maybe

**Was this pain present before you started in ophthalmology service?**

- Yes
- No

**Does this pain decrease during weekends and vacations?**

- Yes
- No

**Do you have an idea about what is workplace ergonomics?**

- Yes
- No

**Performance of 3D heads-up display compared to conventional microscopy**

**how did you find the peripheral field?**

- Better
- Worse
- no difference

**how did you find the quality of image?**

- Better
- Worse
- no difference

**How did you find the depth of field?**

- Better
- Worse
- no difference

**How did you find the integration with current equipment e.g. microscope vitrectomy machine?**

- Better
- Worse
- no difference

**Regarding the surgical education, (for attending) did you find any advantage during teaching techniques to your trainees? (for trainee) did this system help you easily understand instructions given by your supervisor while performing procedure?**

- Better
- Worse
- no difference

**do you recommend using 3D heads-up display as a teaching and training tool?**

- Yes
- No

**do you recommend using 3D heads-up display in general?**

- Yes
- No

**if No, could you please write in few words your reasons? (qualitative)**
